# Supplementary material
Source: publisher site journal article supplement (http://kjim.org/upload/media/kjim-2016-296-suppl4.pdf)
Supplement: Supplementary file 1 [file kjim-2016-296-suppl4.pdf]

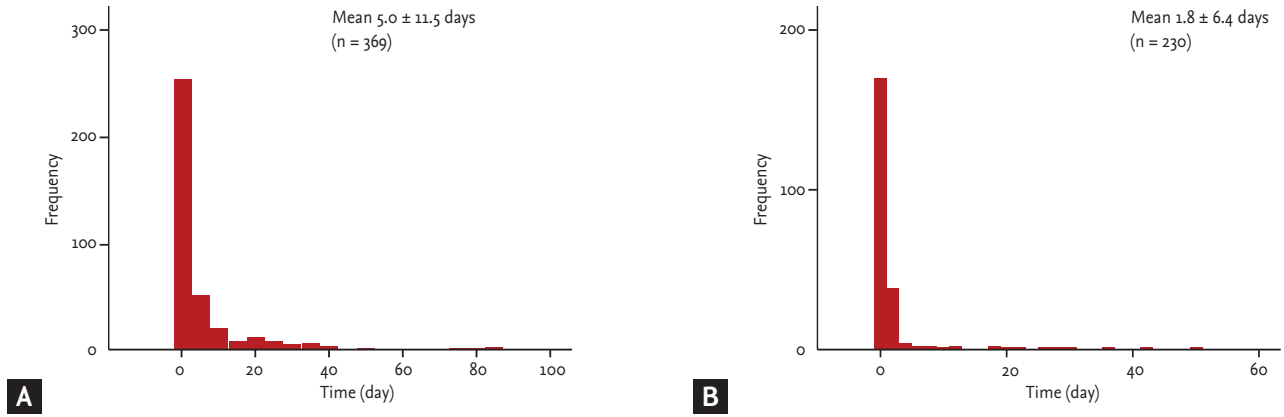

**Supplementary Figure 1.** A frequency distribution histogram of the interval between the timing of lab data and that of dialysis initiation according to nephrology referral. (A) Early referral. (B) Late referral.
